# Supplementary material for: Glycaemic control boosts glucosylated nanocarrier crossing the BBB into the brain
Source: PubMed Central journal article supplement (PMC5645389; doi:10.1038/s41467-017-00952-3), 2017-10-17
Supplement: 41467_2017_952_MOESM2_ESM.pdf [file 41467_2017_952_MOESM2_ESM.pdf]

### **Description of Additional Supplementary Files**

File Name: Supplementary Movie 1

Description: The movie file shows Gluc(6)/m (red) in the mouse cerebrum observed by intravital multiphoton microscopy 48 h after administration.
